# Supplementary material for: Characterizing the structure–activity relationships of natural products, tanshinones, reveals their mode of action in inhibiting spleen tyrosine kinase
Source: Royal Society of Chemistry journal article supplement (doi:10.1039/d0ra08769f), 2021-01-01
Supplement: d0ra08769f1.pdf [file d0ra08769f1.pdf]

## **Characterizing the Structure-Activity Relationships of Natural Products, Tanshinones, Reveals their Mode of Action in Inhibiting Spleen Tyrosine Kinase**

Min-Che Tung<sup>a#</sup>, Keng-Chang Tsai<sup>bc#</sup>, Kit-Man Fung<sup>d</sup>, Ming-Jaw Don<sup>b</sup> and Tien-Sheng Tseng<sup>e\*</sup>

- a. Department of Stomatology, Tung's MetroHarbor Hospital, Taichung, Taiwan.
- b. National Research Institute of Chinese Medicine, Ministry of Health and Welfare, Taipei, Taiwan.
- c. Ph.D. Program in Medical Biotechnology, College of Medical Science and Technology, Taipei Medical University, Taipei, Taiwan.
- d. Institute of Biological Chemistry, Academia Sinica, Taipei 115, Taiwan.
- e. Institute of Molecular Biology, National Chung Hsing University, Taichung, Taiwan.

# These authors contributed equally to this work.

\* To whom correspondence should be addressed.

## Supporting information

(A)

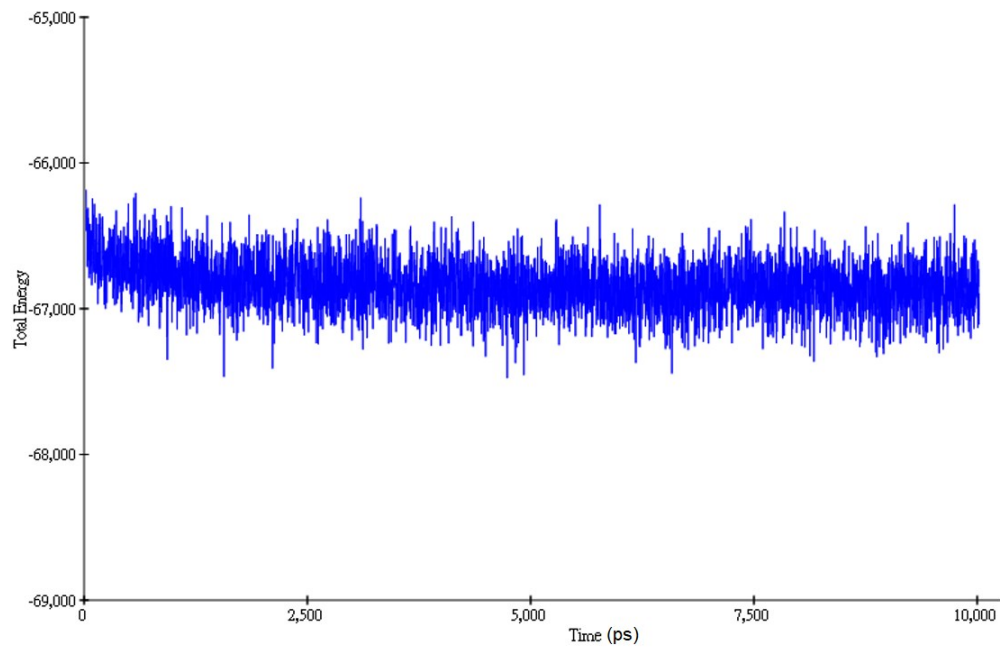

(B)

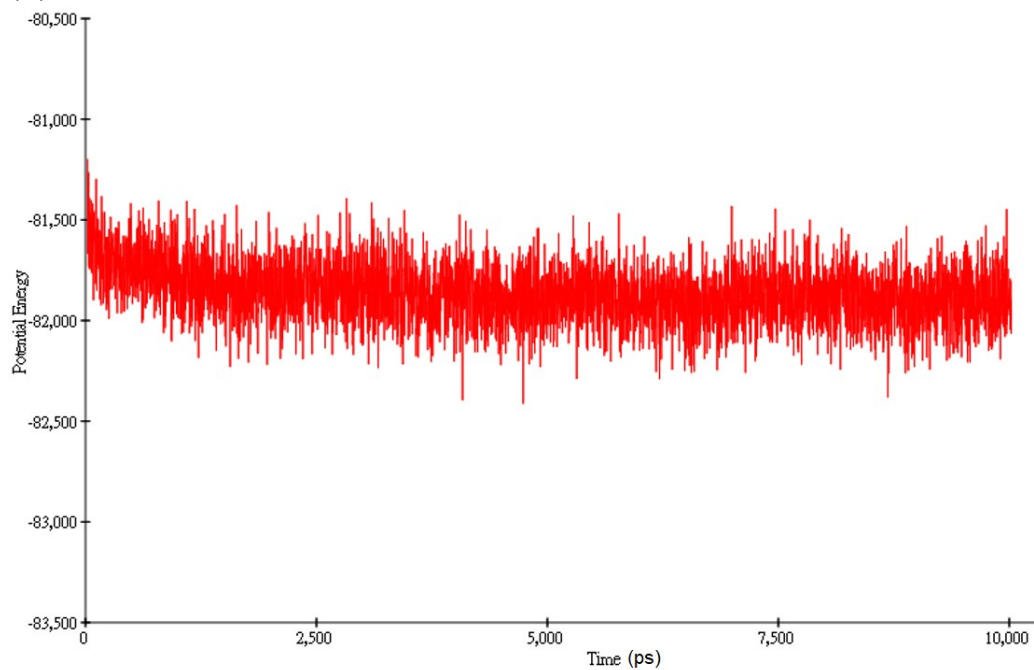

**Figure S1. The molecular dynamics simulations of SYK-TanI complex for 10 ns.**  
(A) The total energy as a function of time (B) The potential energy as a function of time.

(A)

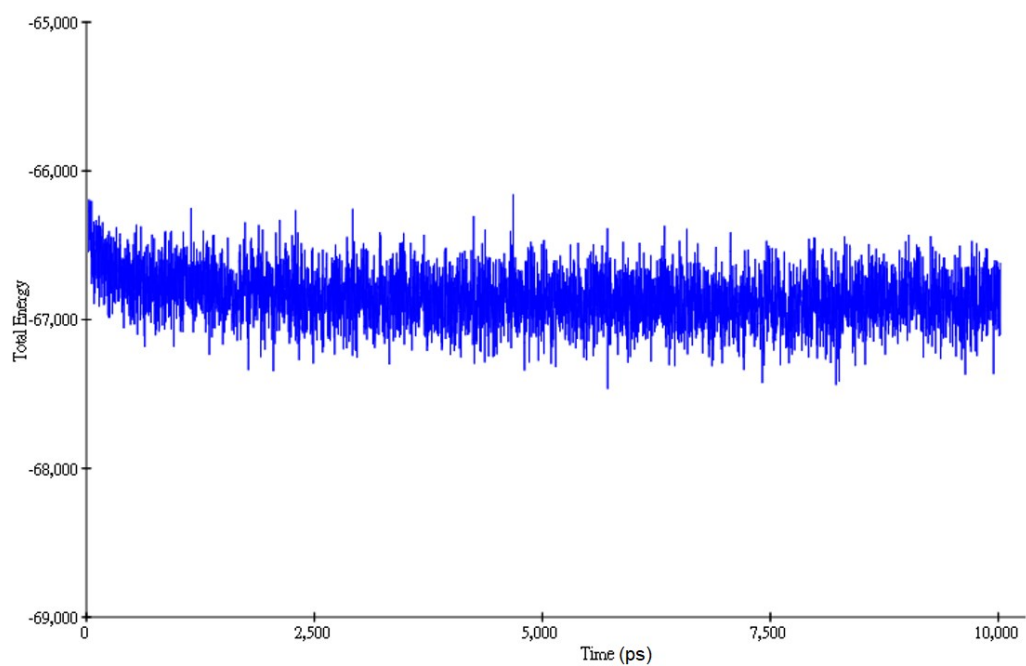

(B)

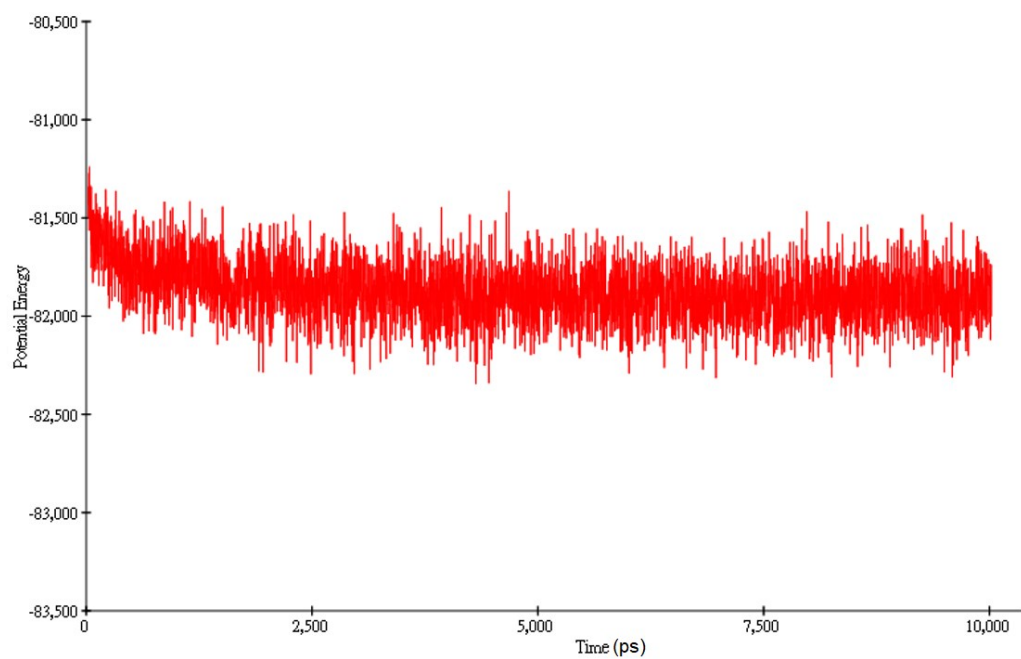

**Figure S2. The molecular dynamics simulations of SYK-TanIIA complex for 10 ns. (A) The total energy as a function of time (B) The potential energy as a function of time.**

(A)

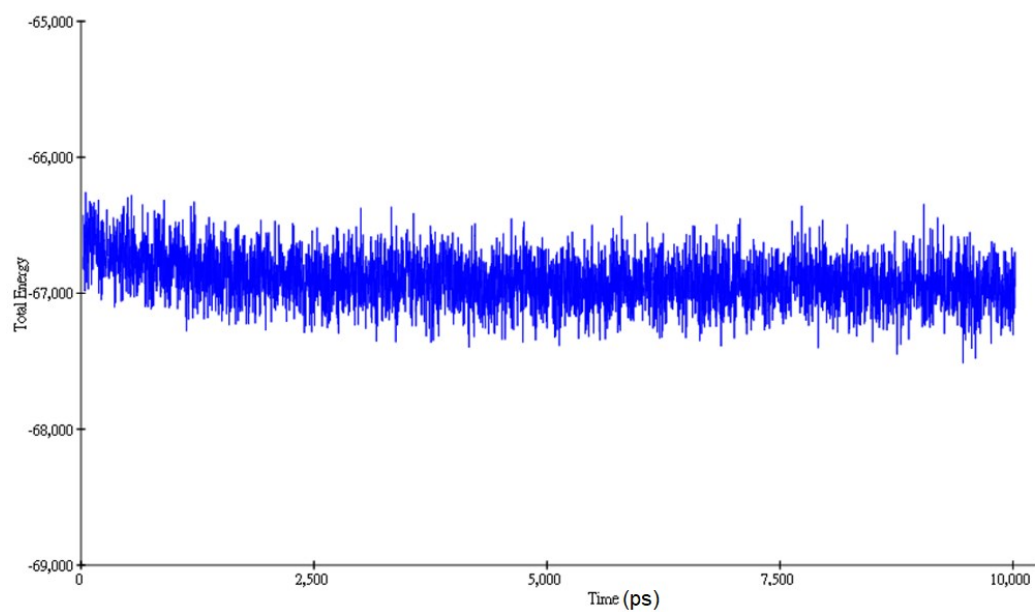

(B)

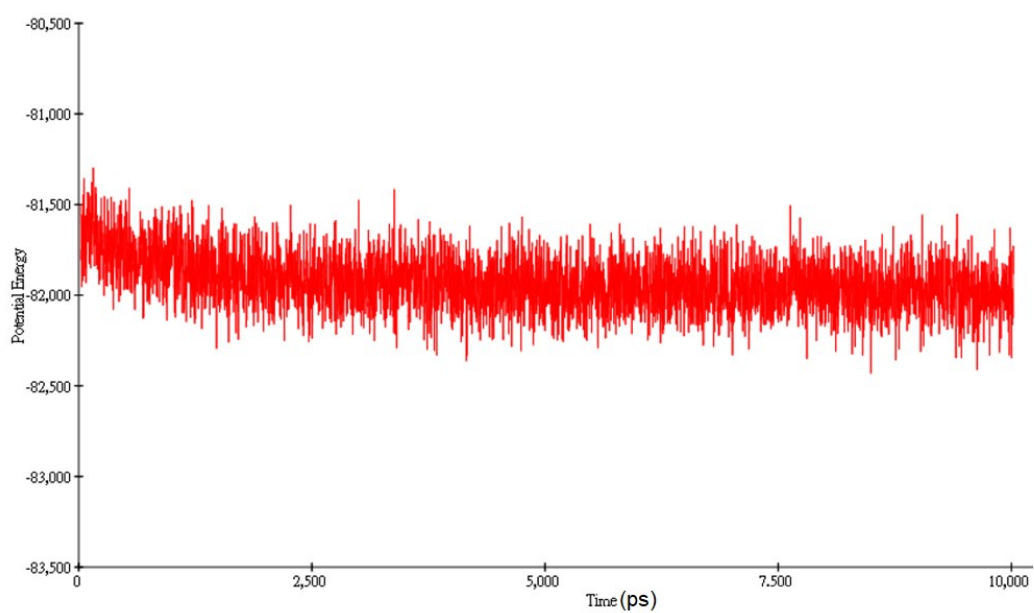

**Figure S3. The molecular dynamics simulations of SYK-ST32da complex for 10 ns. (A) The total energy as a function of time (B) The potential energy as a function of time.**

**(A)**

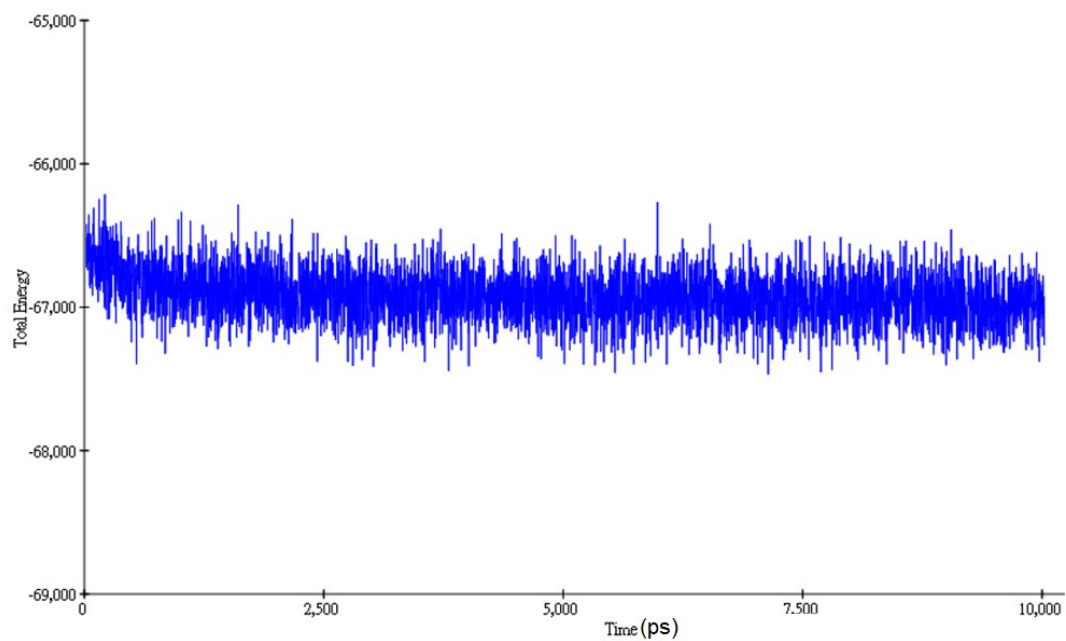

**(B)**

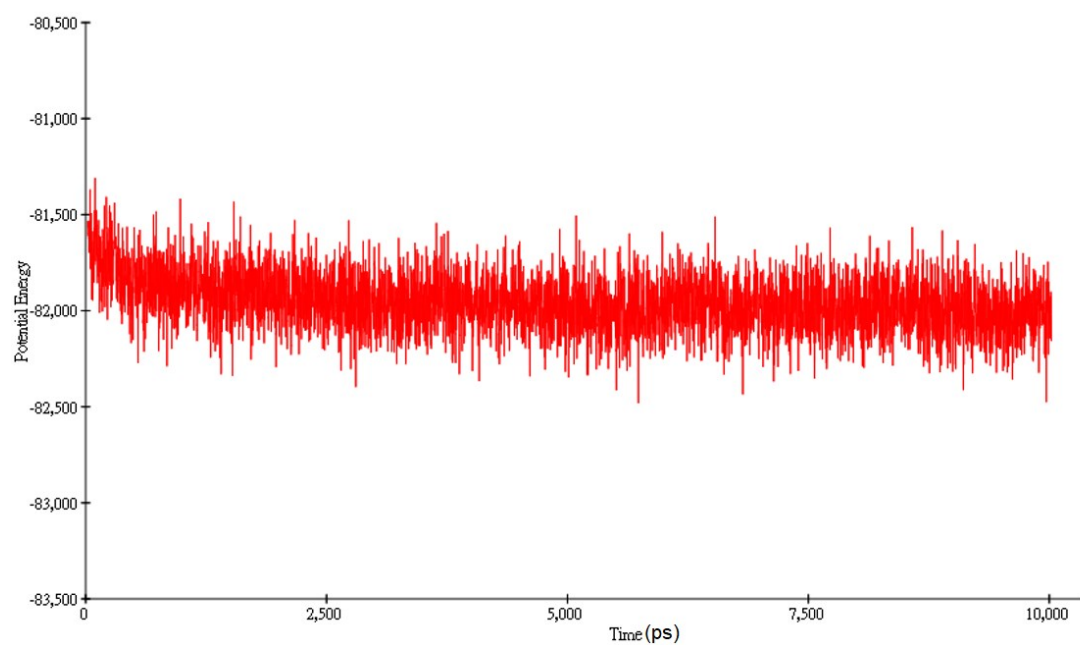

**Figure S4. The molecular dynamics simulations of SYK-ST32db complex for 10 ns. (A) The total energy as a function of time (B) The potential energy as a function of time.**

**(A)**

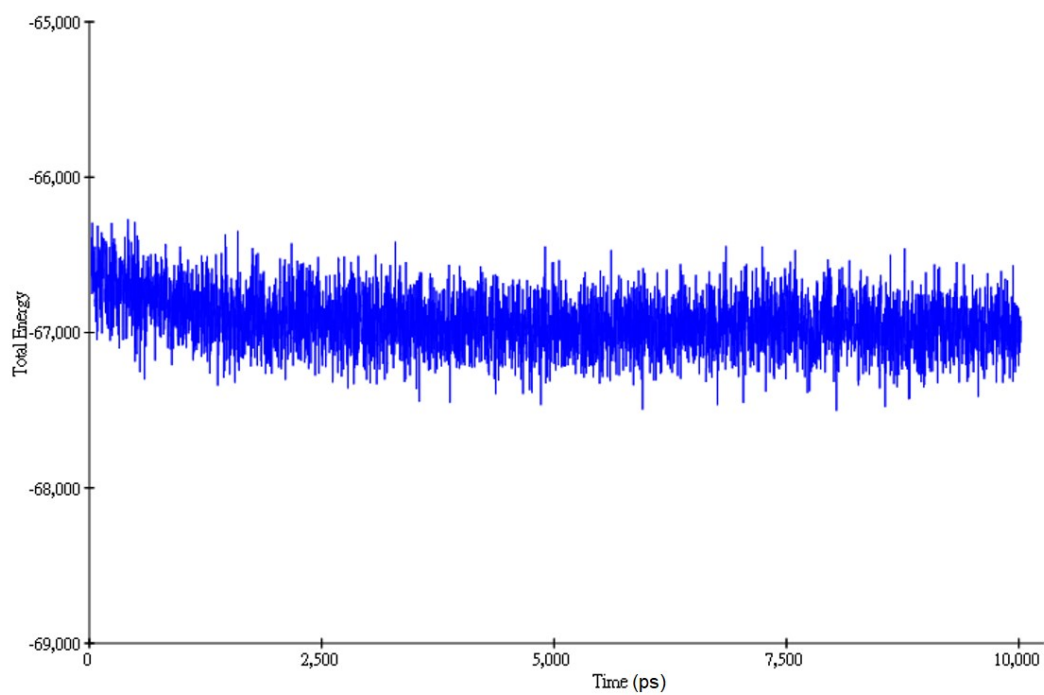

**(B)**

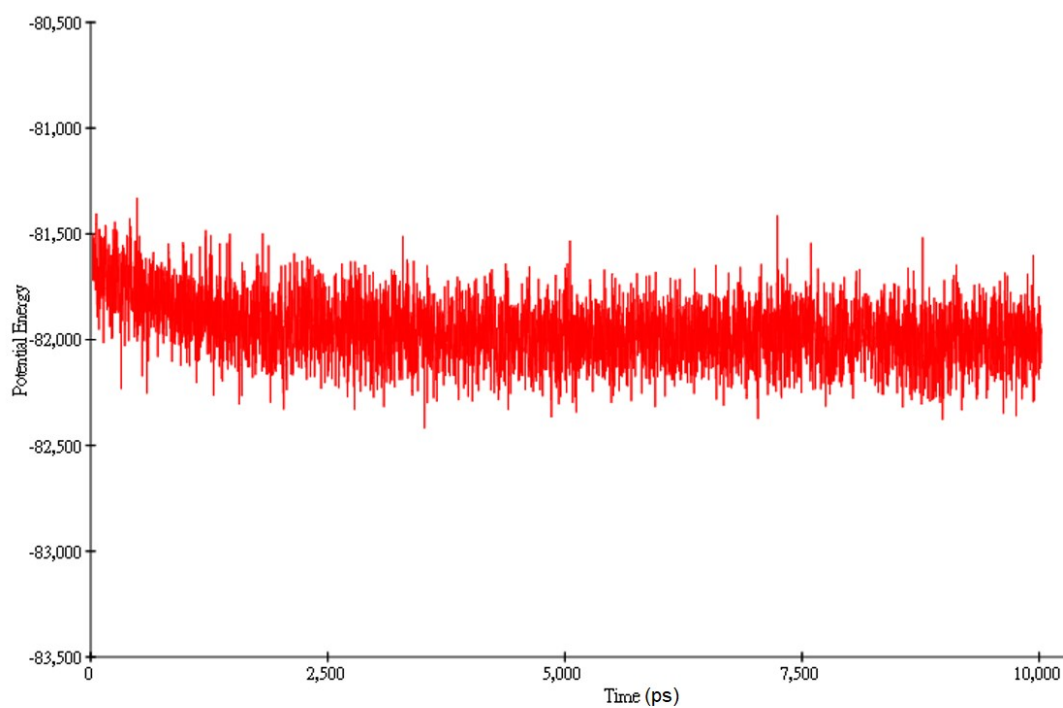

**Figure S5. The molecular dynamics simulations of SYK-ST64 complex for 10 ns. (A) The total energy as a function of time (B) The potential energy as a function of time.**

(A)

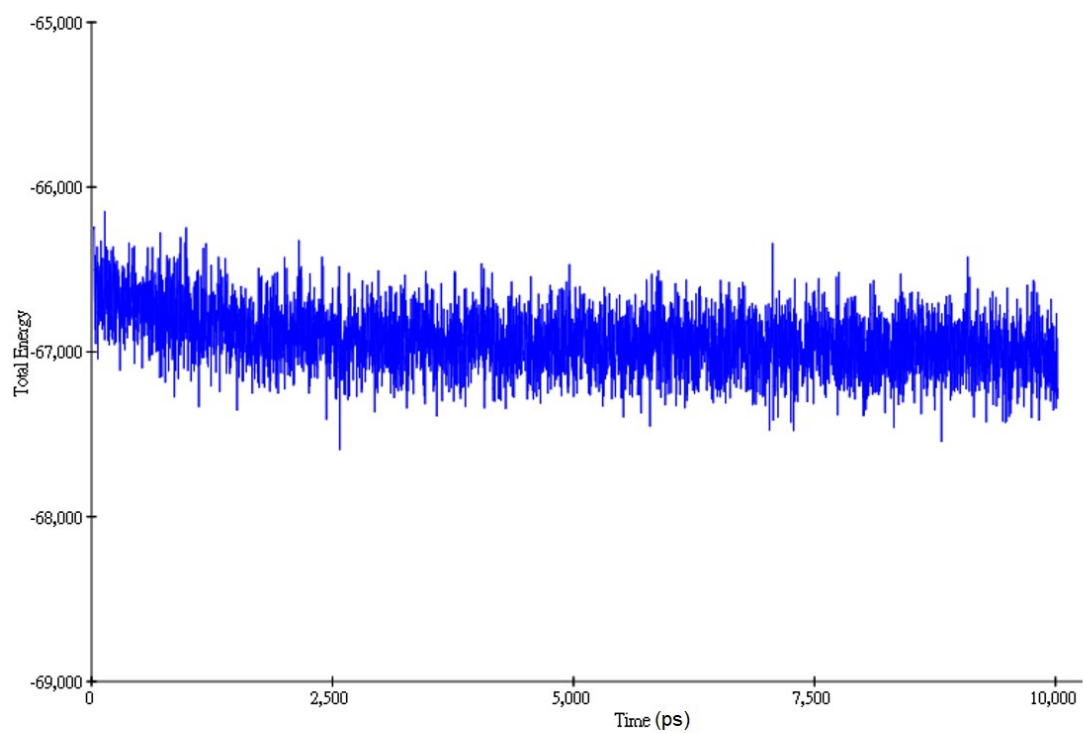

(B)

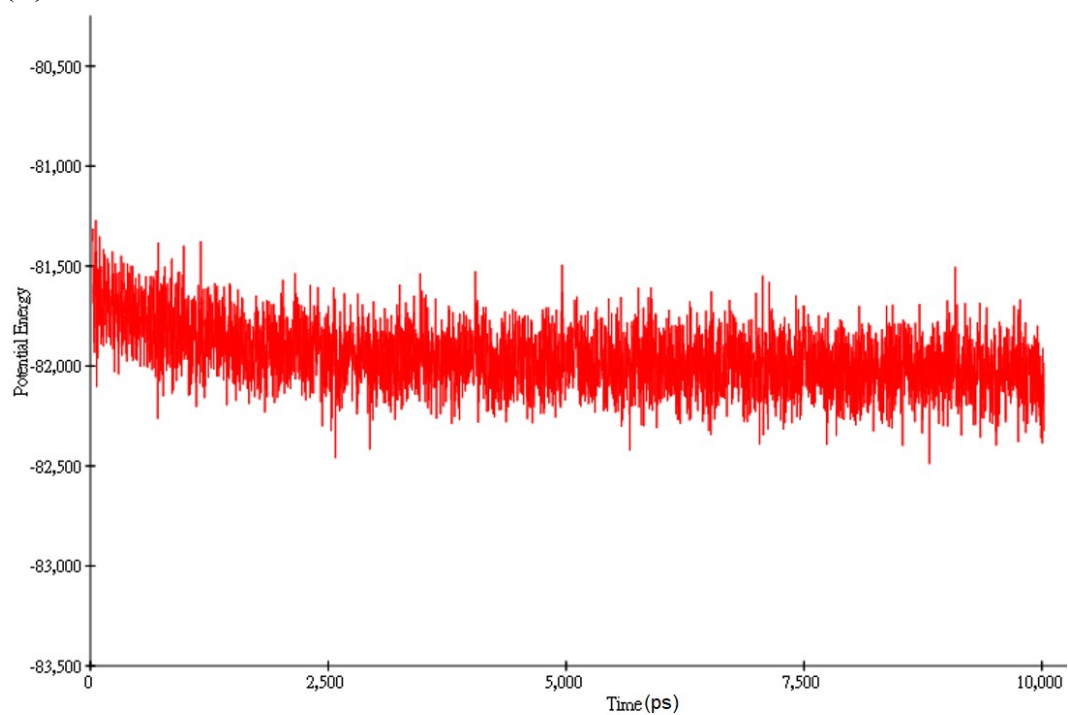

**Figure S6. The molecular dynamics simulations of SYK-WST23 complex for 10 ns. (A) The total energy as a function of time (B) The potential energy as a function of time.**
